# Supplementary material
Source: Springer Nature journal article supplement (https://www.springermedizin.de/resource/supplementary/13054_2013_2191_MOESM1_ESM.pdf/9712638)
Supplement: MOESM1 [file 9712638]

Supplemental Table 1 -- Septic Patients

| Pt # | Age | Gender | Clinical Cond.                                                                                 | Days in ICU | Micro                                           | New Secondary Infections                                                                                                       | Total WCC | Apache II | SOFA Score |
|------|-----|--------|------------------------------------------------------------------------------------------------|-------------|-------------------------------------------------|--------------------------------------------------------------------------------------------------------------------------------|-----------|-----------|------------|
| 1    | 71  | Male   | elevated wcc, febrile, hypotensive, pressors, tachycardic, tachypneic, mechanical ventilation  | 30          | Tracheal aspirate- MRSA, Pseudomonas aeruginosa | CXR- right upper lobe airspace opacity consistent with pneumonia                                                               | 23.9      | 26        | 9          |
| 2    | 71  | Male   | elevated wcc, febrile, tachycardic, tachypneic                                                 | 15          | Stool- C.diff.                                  | Pancreatic Abscess                                                                                                             | 13.1      | 14        | 4          |
| 3    | 28  | Male   | elevated wcc, afebrile, hypotensive, pressors, tachycardic, tachypnic, mechanical ventilation. | 98          | BAL- Klebsiella oxytoca                         | bilateral lung parenchyma patchy opacities that may represent combination of pneumonia, atelectasis, infarction, or contusion. | 59.4      | 22        | 13         |
| 4    | 25  | Female | normal wcc, febrile, hypotensive, pressors, tachycardic, tachypneic, mechanical ventilation    | 41          | Trach Aspirate- Pseudomonas aeruginosa          | wound infection                                                                                                                | 5.7       | 13        | 8          |
| 5    | 77  | Female | elevated wcc, afebrile, hypotensive, pressors, tachypneic, increased oxygen requirements       | 3           |                                                 |                                                                                                                                | 11.7      | 16        | 10         |
| 6    | 21  | Female | elevated wcc, afebrile, hypotensive, pressors, tachycardic, mechanical ventilation             | 20          | Urine- Enterococcus species                     |                                                                                                                                | 16        | 21        | 13         |
| 7    | 49  | Male   | elevated wcc, afebrile, hypotensive, pressors, tachycardic                                     | 6           | Urine- Serratia marcescens                      |                                                                                                                                | 21.1      | 19        | 15         |
| 8    | 73  | Female | elevated wcc, febrile, hypotensive, pressors, tachycardic, tachypneic, mechanical ventilation  | 17          | Stool- C.diff.                                  |                                                                                                                                | 14.7      | 23        | 10         |
| 9    | 55  | Male   | elevated wcc, febrile, hypotensive, pressors, mechanical ventilation                           | 11          |                                                 | CXR- focal nodular opacity in the left midlung which in the appropriate clinical setting may represent a developing pneumonia. | 24.7      | 21        | 9          |
| 10   | 76  | Male   | elevated wcc, hypotensive, pressors, tachycardic, mechanical ventilation                       | 4           |                                                 | Chest CT- multifocal pneumonia at the lung bases with a small focus of cavitation in the lingula                               | 14.6      | 22        | 10         |
| 11   | 51  | Female | normal wcc, febrile, tachycardic, hypotensive, pressors, tachypneic, mechanical ventilation    | 30          | BAL- Stenotrophomonas maltophilia               | CXR- Pneumonia                                                                                                                 | 8.2       | 21        | 9          |

|    |     |        |                                                                                                |    |                                                        |                      |      |    |    |
|----|-----|--------|------------------------------------------------------------------------------------------------|----|--------------------------------------------------------|----------------------|------|----|----|
| 12 | 61  | Female | elevated wcc, afebrile, hypotensive, pressors, tachypneic, mechanical ventilation              | 7  | Urine- Klebsiella oxytoca                              |                      | 15   | 18 | 9  |
| 13 | 60  | Female | elevated wcc, febrile, hypotensive, pressors, tachycardic, tachypneic, mechanical ventilation  | 12 | Blood- Streptococcus pneumoniae                        |                      | 28.3 | 21 | 10 |
| 14 | 64  | Female | elevated wcc, hypotensive, pressors, tachycardic                                               | 16 | peritoneal tap- Enterococcus faecium                   |                      | 20.8 | 18 | 10 |
| 15 | 62  | Male   | elevated wcc, afebrile, recovering                                                             | 7  | Sputum- Haemophilus influenzae, MSSA                   |                      | 10.6 | 14 | 5  |
| 16 | >89 | Male   | elevated wcc, hypotensive, pressors, tachycardic                                               | 8  |                                                        | CT- Perforated Cecum | 14.8 | 21 | 12 |
| 17 | 33  | Male   | normal wcc, febrile, hypotensive, pressors, tachycardic, mechanical ventilation                | 15 |                                                        | CHEST CT- Pneumonia  | 7.1  | 18 | 9  |
| 18 | 67  | Female | elevated wcc, afebrile, extubated                                                              | 4  | Urine- E.coli                                          |                      | 10   | 12 | 5  |
| 19 | 56  | Female | elevated wcc, afebrile, hypotensive, pressors, tachycardic, tachypneic, mechanical ventilation | 6  | Neck Abscess- Streptococcus anginosus                  |                      | 13.7 | 16 | 7  |
| 20 | 69  | Male   | elevated wcc, febrile, hypotensive, pressors, tachycardic, tachypnic, mechanical ventilation   | 30 | BAL- Klebsiella pneumoniae, Proteus mirabilis          | VAP                  | 12   | 17 | 6  |
| 21 | 69  | Male   | elevated wcc, febrile, tachycardic, tachypneic                                                 | 6  | BAL- Cytomegalovirus: POSITIVE, Pseudomonas aeruginosa |                      | 17.5 | 16 | 5  |
| 22 | 62  | Female | elevated wcc, febrile, tachypneic, mechanical ventilation                                      | 15 | BLD- Corynebacterium species, Haemophilus influenzae   | VAP                  | 13.5 | 13 | 4  |
| 23 | 76  | Male   | elevated wcc, afebrile, pressors weaned off                                                    | 10 | BLD- Candida albicans                                  | Fungemia             | 10.9 | 15 | 8  |
| 24 | 82  | Female | elevated wcc, febrile, hypotensive, pressors, tachycardic, tachypneic, mechanical ventilation  | 7  | BAL- Moraxella catarrhalis                             |                      | 14.9 | 19 | 11 |
| 25 | 55  | Male   | elevated wcc, afebrile, hypotensive, pressors, tachycardic, tachypneic                         | 10 | Abscess- VRE; Paracentesis - Enterococcus faecium      | Abscess              | 13.9 | 13 | 6  |
| 26 | 69  | Male   | elevated wcc, febrile, tachycardic, tachypneic                                                 | NA | BLD- Candida glabrata                                  | Fungemia             | 10.9 | 9  | 3  |
| 27 | 60  | Male   | elevated wcc, afebrile, tachypnic                                                              | 8  | BLD- Candida glabrata                                  | Fungemia             | 14.8 | 8  | 3  |
| 28 | 63  | Female | elevated wcc, afebrile, tachycardic, tachypneic, mechanical ventilation, extubated             | 7  | Abscess- Corynebacterium species                       |                      | 15.4 | 12 | 4  |

|     |    |        |                                                                                                |    |                                                                   |                           |      |    |    |
|-----|----|--------|------------------------------------------------------------------------------------------------|----|-------------------------------------------------------------------|---------------------------|------|----|----|
| 29  | 74 | Male   | elevated wcc, afebrile, hypotensive, pressors, extubated                                       | 4  |                                                                   |                           | 11.4 | 11 | 5  |
| 30  | 70 | Female | elevated wcc, afebrile, hypotensive, pressors, tachypneic, mechanical ventilation              | 22 | BLD- Enterobacter cloacae, Candida albicans                       | Fungemia, VAP             | 10.5 | 18 | 10 |
| 31  | 83 | Female | normal wcc, afebrile, pressors weaned off, tachypneic                                          | 5  |                                                                   |                           | 8    | 13 | 3  |
| 32  | 48 | Female | elevated wcc, afebrile, hypotensive, pressors, tachycardic, tachypneic, mechanical ventilation | 13 | Urine-Enterococcus species                                        | UTI                       | 25.1 | 18 | 10 |
| 33  | 33 | Female | normal wcc, afebrile, tachycardic, mechanical ventilation                                      | 11 | Ear Wound- Proteus mirabilis, Staphylococcus lugdunensis          |                           | 9.7  | 14 | 6  |
| 34  | 64 | Female | elevated wcc, afebrile, stable                                                                 | NA | GPC                                                               |                           | 11.7 | 13 | 6  |
| 35  | 44 | Male   | elevated wcc, afebrile, tachycardic, mechanical ventilation                                    | 5  |                                                                   |                           | 11.3 | 16 | 9  |
| 36  | 44 | Male   | elevated wcc, febrile, hypotensive, pressors, tachycardic, tachypneic, mechanical ventilation  | 10 | BLD- MRSA; Abscess- Streptococcus agalactiae, MRSA                |                           | 18.9 | 33 | 15 |
| 37  | 77 | Female | elevated wcc, afebrile, stable, positive fungal bld cx.                                        | NA | BLD- Candida glabrata                                             |                           | 10.3 | 10 | 2  |
| 38  | 64 | Female | elevated wcc, afebrile, tachycardic                                                            | NA | BLD- Candida glabrata                                             |                           | 11.6 | 8  | 4  |
| 39  | 70 | Female | elevated wcc, afebrile, extubated                                                              | 10 | Stool- VRE; Abd Fld- Candida albicans, Bacteroides fragilis group |                           | 18.6 | 10 | 3  |
| 40  | 64 | Female | elevated wcc, febrile, hypotensive, pressors, tachycardic, mechanical ventilation              | 23 | BLD- Enterococcus faecium                                         | Abscess                   | 10.4 | 25 | 15 |
| 41  | 62 | Male   | elevated wcc, febrile, tachycardic                                                             | NA | BLD- Candida albicans                                             | line infection            | 12.2 | 7  | 2  |
| 42* | 83 | Male   | elevated wcc, febrile, hypotensive, pressors, tachycardic, tachypneic                          | 14 | trach aspirate- Haemophilus influenzae                            | CXR- developing Pneumonia | 19.9 | 20 | 9  |
| 43* | 42 | Male   | elevated wcc, febrile, hypotensive, pressors, tachycardic, tachypneic, mechanical ventilation  | 16 |                                                                   | VAP                       | 10.8 | 16 | 4  |

\* Admitted as non-septic but developed sepsis

**BAL**, bronchial alveolar lavage; **BLD**, blood; **C. diff**, Clostridia difficile; **CT**, CT scan; **CXR**, chest x-ray; **GPC**, Gram positive cocci;

**MRSA**, methicillin resistant Staph. aureus; **pressors**, vaso pressors; **VAP**, ventilator associated pneumonia; **WCC**, white cell count
